# Supplementary material for: Upscaling Participatory Action and Videos for Agriculture and Nutrition (UPAVAN) trial comparing three variants of a nutrition-sensitive agricultural extension intervention to improve maternal and child nutritional outcomes in rural Odisha, India: study protocol for a cluster randomised controlled trial
Source: Springer Nature journal article supplement (doi:10.1186/s13063-018-2521-y), 2018-03-09
Supplement: MOESM1 [file 15523314]

## UPAVAN plan

### Example of 7 fortnights

|             | AGRI                     |                                                                  |                                                                                       |                                                                                                                                                                                                                                                                                                                      | AGRI-NUT                                        | AGRI-NUT+PLA                                                                                                     |
|-------------|--------------------------|------------------------------------------------------------------|---------------------------------------------------------------------------------------|----------------------------------------------------------------------------------------------------------------------------------------------------------------------------------------------------------------------------------------------------------------------------------------------------------------------|-------------------------------------------------|------------------------------------------------------------------------------------------------------------------|
| Month       | Topic                    | Agriculture practice                                             | NSA pathway and practice                                                              | Rationale                                                                                                                                                                                                                                                                                                            | Topic                                           | Topic                                                                                                            |
| 15 Sep 2017 | Carrot                   | Seed treatment and planting                                      | PRODUCE FOOD<br>Women in 1000-day period and children consume carrots                 | <ul style="list-style-type: none"> <li>Carrot grown in this season, in kitchen gardens (the last video).</li> <li>Carrots are nutrient rich.</li> <li>At this time of year, women are engaged in paddy harvesting and weeding so carrots are a good crop to promote because they are not labour intensive</li> </ul> | Nutrition during pregnancy and lactation        | 5 <sup>th</sup> PLA meeting in which groups prioritise and vote on the problems that they would like to address. |
| 5 Oct 2017  | Cowpea                   | Combatting cowpea diseases (jau poka and sahebi poka)            | PRODUCE FOOD<br>Women in 1000-day period and children consume cowpea                  | <ul style="list-style-type: none"> <li>Cow pea is protein rich and the only pulse that is commonly grown in this area.</li> <li>Cowpea is grown at this time, mainly in kitchen gardens.</li> <li>Farmers struggle with cowpea diseases - Oct is the right time to address this.</li> </ul>                          | Cow pea                                         | Cow pea                                                                                                          |
| 25 Oct 2017 | Composting               | Digging the pit, and the key ingredients required for composting | DO NO HARM<br>Hand-washing and environmental safety during composting                 | <ul style="list-style-type: none"> <li>Composting is important at this time of year for future planting in the next year.</li> </ul>                                                                                                                                                                                 | Adding one extra snack between lunch and dinner | 6 <sup>th</sup> PLA meeting in which map locally available resources                                             |
| 10 Nov 2017 | Paddy drying and storage | Ways to store paddy and detect fungus                            | REDUCE WORK<br>Women are involved in decisions about labour sharing for harvesting by | <ul style="list-style-type: none"> <li>Appropriate time of year for drying paddy</li> <li>Farmers experience post-harvest</li> </ul>                                                                                                                                                                                 | Paddy drying and storage                        | Paddy drying and storage                                                                                         |

|             |                                                |                                 |                                                                                                                                                                                                                       |                                                                                                                                                                                                                                                                                                                                                                                                                                                     |                                                                                                                                                         |                                                                                                           |
|-------------|------------------------------------------------|---------------------------------|-----------------------------------------------------------------------------------------------------------------------------------------------------------------------------------------------------------------------|-----------------------------------------------------------------------------------------------------------------------------------------------------------------------------------------------------------------------------------------------------------------------------------------------------------------------------------------------------------------------------------------------------------------------------------------------------|---------------------------------------------------------------------------------------------------------------------------------------------------------|-----------------------------------------------------------------------------------------------------------|
|             |                                                |                                 | pregnant and lactating women.                                                                                                                                                                                         | losses due to fungus                                                                                                                                                                                                                                                                                                                                                                                                                                |                                                                                                                                                         |                                                                                                           |
| 25 Nov 2017 | Spending decisions                             | All NSA                         | <p>MAKE DECISIONS</p> <p>Women are involved in decisions about how much rice to consume, sell, process (for value addition), and save for seeds. Women are involved in decisions about using income for nutrition</p> | <ul style="list-style-type: none"> <li>Budget planning is important at this time of year because rice has just been harvested, and there are many festivals.</li> </ul>                                                                                                                                                                                                                                                                             | Spending decisions                                                                                                                                      | Spending decisions                                                                                        |
| 10 Dec 2017 | Oyster mushroom cultivation                    |                                 | <p>MAKE DECISIONS</p> <p>Joint decision-making around how to spend income for nutrition (with emphasis on what should be bought)</p>                                                                                  | <ul style="list-style-type: none"> <li>Topic demanded by community.</li> <li>Straw is easily available to build a mushroom bed; other inputs are cheap.</li> <li>Good for income (not particularly nutrient-rich), around 100-120 Rs/kg.</li> <li>There is a high market demand.</li> <li>Cheap inputs.</li> <li>Easy for women to do herself, whilst taking care of children.</li> <li>Helps with the income flow shortages in January.</li> </ul> | Overcoming concerns about eating less during pregnancy (fear of having a large baby, eating down, fasting, restriction, morning sickness, feeling full) | 7 <sup>th</sup> PLA meeting in which groups understand the causes and effects of two prioritized problems |
| 26 Dec 2017 | Cultivation of different species of Amaranthus | Planting and spacing techniques | <p>PRODUCE FOOD</p> <p>Consume Amaranthus year-round</p>                                                                                                                                                              | <ul style="list-style-type: none"> <li>Topic demanded by community.</li> <li>Appropriate time of year, during food and income flow shortages</li> </ul>                                                                                                                                                                                                                                                                                             | Cultivation of different species of Amaranthus                                                                                                          | Cultivation of different species of Amaranthus                                                            |
